# Supplementary material for: Differences in gene expression within a striking phenotypic mosaic Eucalyptus tree that varies in susceptibility to herbivory
Source: PubMed Central journal article supplement (PMC3599227; doi:10.1186/1471-2229-13-29), 2013-02-20

Volcano Plot (Kal's test)

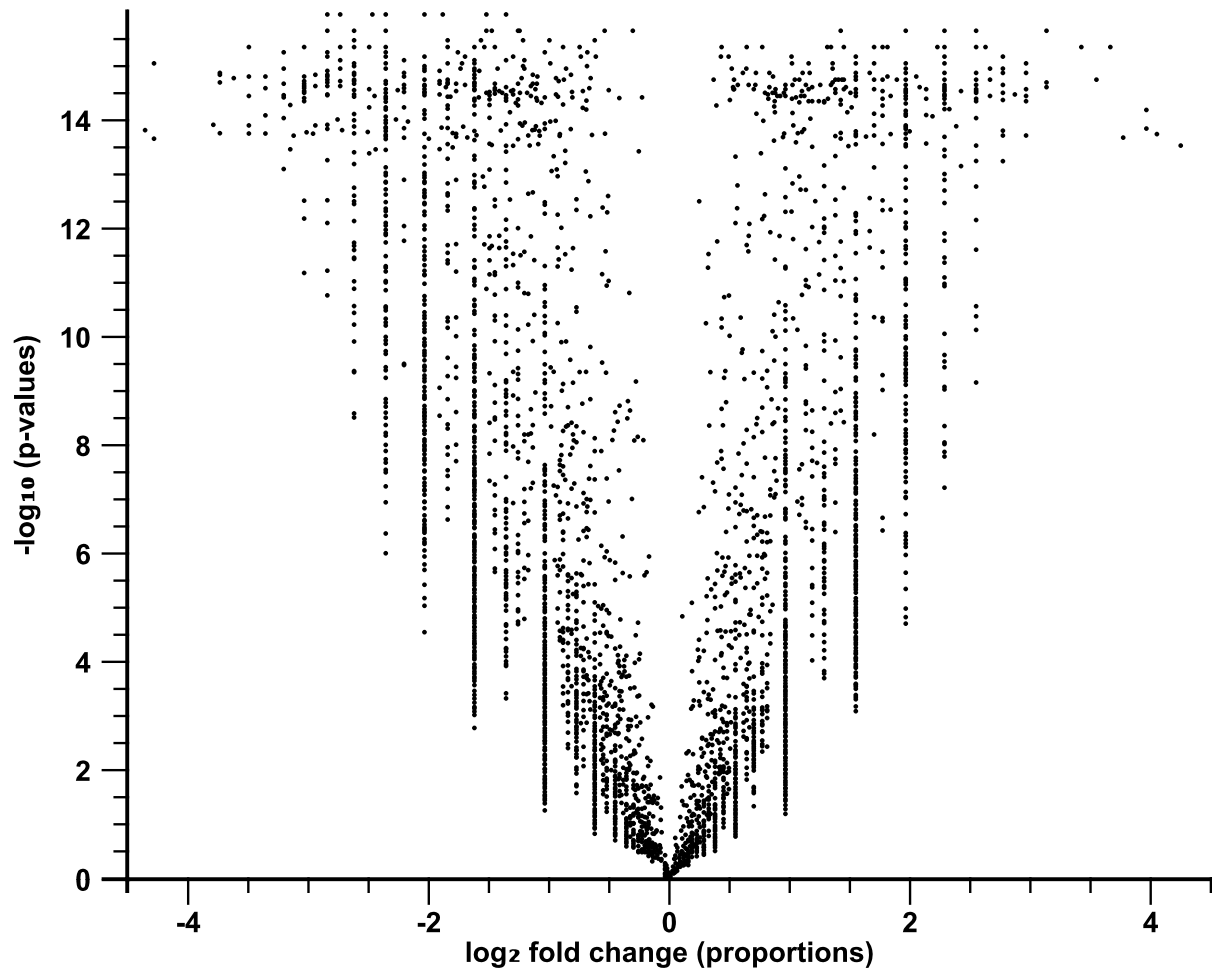

Supplement: 1471-2229-13-29-S2.pdf [file 1471-2229-13-29-S2.pdf]
